# Supplementary material for: The importance of social environment in preventing smoking: an analysis of the Dead Cool intervention
Source: Springer Nature journal article supplement (doi:10.1186/s12889-019-7485-7), 2019-08-28
Supplement: MOESM1 [file 17111726]

22. Please say how much you agree or disagree with the following sentences (Please circle your answer)

**My life is going well**

Strongly agree      Tend to agree      Neither agree nor disagree      Tend to disagree      Strongly disagree      Don't know

**My life is just right**

Strongly agree      Tend to agree      Neither agree nor disagree      Tend to disagree      Strongly disagree      Don't know

**I wish I had a different kind of life**

Strongly agree      Tend to agree      Neither agree nor disagree      Tend to disagree      Strongly disagree      Don't know

**I have a good life**

Strongly agree      Tend to agree      Neither agree nor disagree      Tend to disagree      Strongly disagree      Don't know

**I have what I want in life**

Strongly agree      Tend to agree      Neither agree nor disagree      Tend to disagree      Strongly disagree      Don't know

23. How much do the following statements describe you? (Please circle your answer)

**I get in trouble in school**

Exactly like me      Pretty much like      A little like me      Not at all like me

**I do things my parents wouldn't want me to do**

Exactly like me      Pretty much like      A little like me      Not at all like me

**I like scary things**

Exactly like me      Pretty much like      A little like me      Not at all like me

**I like to do dangerous things**

Exactly like me      Pretty much like      A little like me      Not at all like me

24. Have you ever stayed away from school without permission (truanted/bunked off)?

Yes       No       Don't know

25. Do you think school has given you enough information on smoking?

Yes       No       Don't know

26. How should the school offer advice and support on smoking?

27. Do you get regular pocket money (from parents, relatives)?

Yes       No

28. Can you spend your money however you like?

Yes       No

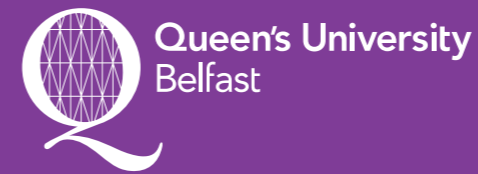

# DEAD COOL SURVEY

SCHOOL OF Education

**SCHOOL:** \_\_\_\_\_

**STUDENT'S FULL NAME:** \_\_\_\_\_

**DATE OF BIRTH:** \_\_\_\_\_

**OFFICE USE ONLY**

**SCHOOL CODE:** \_\_\_\_\_

**PUPIL CODE:** \_\_\_\_\_

Thanks you for agreeing to take part in our study. We promise that your answers are confidential. They will not be shown to anyone that you know.

**Example questions:**

Most of the questions can be answered by putting a tick in the box next to the answer that applies to you. Sometimes you can circle the answer. Or sometimes you have to write a number in the box. Sometimes you have to write in an answer, for example: What is your favourite colour? blue

1. Are you a boy or a girl?

\_\_\_\_\_

2. What age are you?

\_\_\_\_\_

3. What is your postcode e.g. BT12 8NF?

\_\_\_\_\_

4. What is your ethnic group?

Tick one box only, the one that is most true for you

- White British
- African
- White Irish
- Any other ethnic group (please write in)
- Asian
- Chinese

5. Who do you live with? (please tick all that apply)

- Mother
- Father
- Step-parent
- (Other please write in)
- Sisters/brothers
- Foster care

\_\_\_\_\_

The next questions are about cigarettes. Remember that your name is not on the questionnaire, so no-one who knows you will find out your answers.

6. Do you smoke cigarettes at all nowadays?

- Yes  No

7. Now read the following statements carefully and tick the box next to the one which best describes you.

- I have never smoked  
 I have only ever tried smoking once  
 I used to smoke sometimes but I never smoke a cigarette now  
 I sometimes smoke cigarettes now but I don't smoke as many as one a week

7. Just to check, read the statements below carefully and tick the box next to the one which best describes you.

- I have never tried smoking a cigarette, not even a puff or two  
 I did once have a puff or two of a cigarette, but I never smoke now  
 I do sometimes smoke cigarettes

8. If you DO smoke, please answer the next question. If not, please skip to Question 10.

- I usually smoke between one and six cigarettes a week  
 I usually smoke more than six cigarettes a week  
 How many cigarettes do you smoke in a week?

9. How old were you when you first tried smoking a cigarette, even if it was only a puff or two?

Write your age in the box. If you have never smoked, please skip to Question 10.

I was \_\_\_\_\_ years old.

10. How do you think your family would feel if you started smoking? Tick all that apply.

- They would try to stop me  
 They would try to persuade me not to smoke  
 They would do nothing  
 They would encourage me to smoke  
 I don't know

11. In the past year, have you seen cigarette packets on display in any of the shops listed below?

Tick all that apply.

- A supermarket  
 A newsagent, tobacconist or a sweet shop  
 A petrol station or garage shop  
 Some other type of shop  
 Have not seen cigarettes for sale in any of these places

12. Do any of these people that you know smoke cigarettes? Tick all that apply

- My boyfriend or girlfriend  
 Some friends of my own age  
 Some friends older than me  
 Some friends younger than me  
 My mother  
 My father  
 My step-parent  
 My brother or sister  
 Other relatives  
 None of my friends or family smoke

13. Can you name your five closest friends in your school class? Please put a mark beside your best friend's name.

1. \_\_\_\_\_  
 2. \_\_\_\_\_  
 3. \_\_\_\_\_  
 4. \_\_\_\_\_  
 5. \_\_\_\_\_

14. In the past year, how often were you in the same room as someone smoking at home?

- Every day or most days  
 Once or twice a week  
 Once or twice a month  
 Less often than once a month  
 Never in the past year  
 Don't know

15. In the past year, how often were you in the same room as someone smoking at someone else's home?

- Every day or most days  
 Once or twice a week  
 Once or twice a month  
 Less often than once a month  
 Never in the past year  
 Don't know

16. In the past year, how often were you in your family's car with somebody smoking?

- Every day or most days  
 Once or twice a week  
 Once or twice a month  
 Less often than once a month  
 Never in the past year  
 Don't know

17. In the past year, how often were you in someone else's car with somebody who was smoking?

- Every day or most days  
 Once or twice a week  
 Once or twice a month  
 Less often than once a month  
 Never in the past year  
 Don't know

18. Do you think you will try a cigarette soon?

- Yes  No  Don't know

19. If one of your best friends were to offer you a cigarette, would you smoke it? (Please tick your answer)

- Definitely yes  Probably not  
 Probably yes  Definitely not  
 Not sure

20. Do you think you will smoke a cigarette at any time in the next year? (Please tick your answer)

- Definitely yes  Probably not  
 Probably yes  Definitely not  
 Not sure

21. Against each statement, circle either TRUE or FALSE

People of my age smoke because it helps them to relax  
**TRUE** **FALSE**

People of my age smoke because they are addicted to cigarettes  
**TRUE** **FALSE**

People of my age smoke because they believe it helps them to stay slim  
**TRUE** **FALSE**

People of my age smoke because it helps them to cope with stress in their life  
**TRUE** **FALSE**

People of my age smoke to look cool in front of their friends  
**TRUE** **FALSE**

People of my age smoke because they find it exciting to break the rules  
**TRUE** **FALSE**

People of my age smoke because their friends pressure them into it  
**TRUE** **FALSE**
